# Supplementary material for: The membrane-targeting mechanism of host defense peptides inspiring the design of polypeptide-conjugated gold nanoparticles exhibiting effective antibacterial activity against methicillin-resistant Staphylococcus aureus
Source: Royal Society of Chemistry journal article supplement (doi:10.1039/d1tb00533b), 2021-01-01
Supplement: d1tb00533b1.pdf [file d1tb00533b1.pdf]

## Supplementary Information

### Membrane-Targeting Mechanism of Host Defense Peptides Inspiring the Design of Polypeptide-Conjugated Gold Nanoparticles Exhibiting Effective Antibacterial Activity against Methicillin- Resistant *Staphylococcus aureus*

Weiwei Zhang,<sup>1,¶</sup> Yueming Wu,<sup>1,¶</sup> Longqiang Liu,<sup>2</sup> Ximian Xiao,<sup>2</sup> Zihao Cong,<sup>2</sup> Ning Shao,<sup>2</sup> Zhongqian Qiao,<sup>2</sup> □Kang Chen,<sup>2</sup> Shiqi Liu,<sup>2</sup> Haodong Zhang,<sup>2</sup> Zhemin Ji,<sup>2</sup> □Xiaoyan Shao,<sup>3</sup> Yidong Dai,<sup>3</sup> Hongyan He,<sup>2</sup> Jiang Xia,<sup>4</sup> Jian Fei<sup>5</sup> and Runhui Liu<sup>\*,1,2</sup>

1 State Key Laboratory of Bioreactor Engineering, East China University of Science and Technology, Shanghai 200237, China

2 Key Laboratory for Ultrafine Materials of Ministry of Education, Frontiers Science Center for Materiobiology and Dynamic Chemistry, Research Center for Biomedical Materials of Ministry of Education, East China University of Science and Technology, Shanghai 200237, China

3 Shanghai Ruijin Rehabilitation Hospital, Shanghai 200023, China

4 Department of Chemistry, The Chinese University of Hong Kong, Shatin, Hong Kong SAR, China

5 Department of General Surgery, Ruijin Hospital Affiliated to Shanghai Jiao Tong University School of Medicine, Shanghai 200025, China

Correspondence should be addressed to R. L. ([rliu@ecust.edu.cn](mailto:rliu@ecust.edu.cn))

¶ W. Z. and Y. W. have equally contributed to the manuscript.

**Fig. S1** GPC traces of peptide polymer DLL<sub>90</sub>BLG<sub>10</sub> at the sidechain protected stage using DMF as the mobile at a flow rate of 1 mL/min.

**Fig. S2** <sup>1</sup>H NMR spectrum of peptide polymer DLL<sub>90</sub>BLG<sub>10</sub> after deprotection (400 MHz, D<sub>2</sub>O).

**Fig. S3** TGA curves of Au NPs and Au@P NPs

**Table S1** MIC and MBC values of Au@P NPs and free peptide polymers against Gram-positive bacteria.

**Table S2** MIC and MBC values of Au@P NPs and free peptide polymers against Gram-negative bacteria.

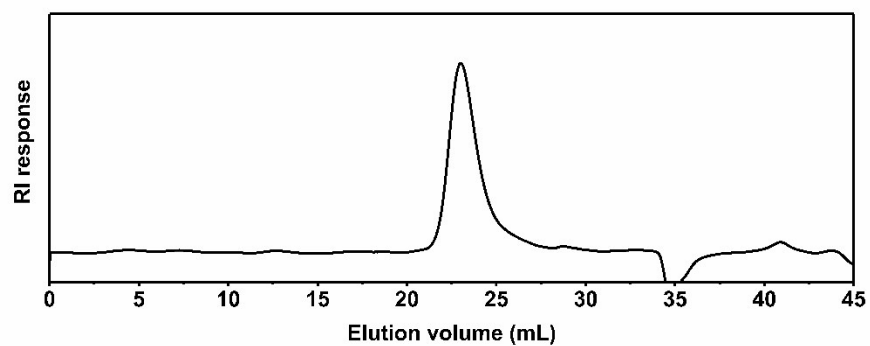

**Fig. S1** GPC traces of peptide polymer DLL<sub>90</sub>BLG<sub>10</sub> at the sidechain protected stage using DMF as the mobile at a flow rate of 1 mL/min.

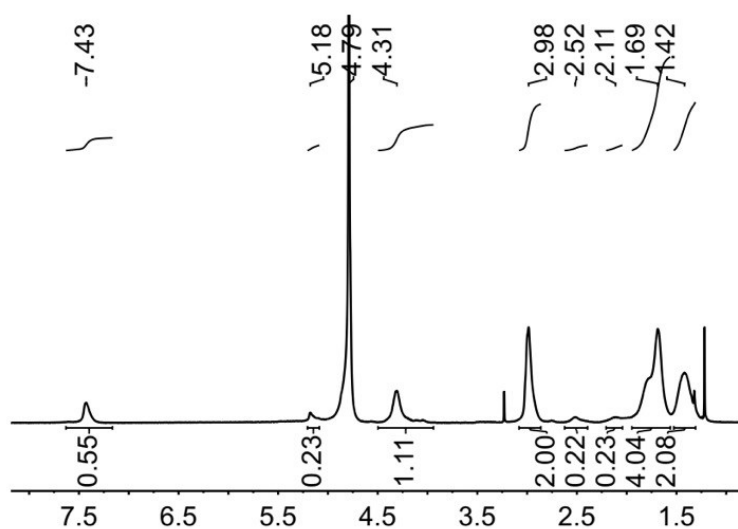

**Fig. S2** <sup>1</sup>H NMR spectrum of peptide polymer DLL<sub>90</sub>BLG<sub>10</sub> after deprotection (400 MHz, D<sub>2</sub>O).

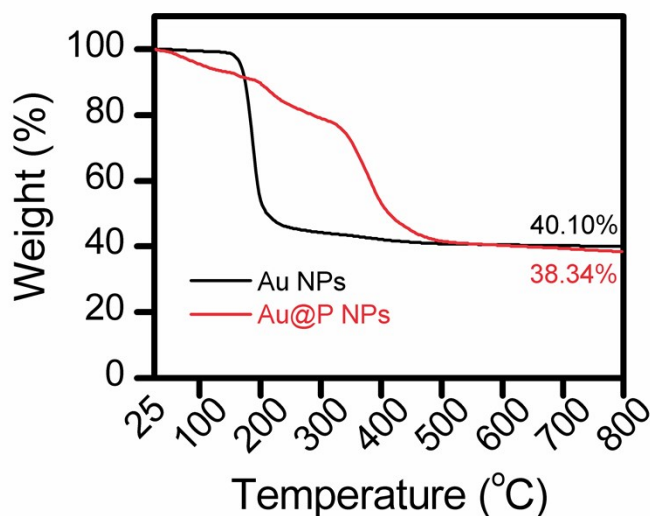

**Fig. S3** TGA curves of Au NPs and Au@P NPs. The annotated number refers to the percentage of residual mass.

**Calculation degree of peptide polymer conjugation to Au NPs from TGA results.<sup>1</sup>** As shown in Equation S1, the weight of peptide polymer in Au@P nanoparticles was divided by the molecular weight of peptide polymer and multiplied by Avogadro's number to calculate the number of peptide polymer molecules lost. The weight of one Au nanoparticle was calculated from its volume (one Au nanoparticle's diameter is 12 nm) and density (19.32 g/cm<sup>3</sup>), and result is around  $1.748 \times 10^{-17}$  g/NP. Then the rest weight of Au@P nanoparticles was divided by the weight of one Au nanoparticle to calculate the number of Au nanoparticles. Finally, the number of peptide polymer molecules lost was divided by the number of Au nanoparticles to obtain the average number of peptide polymer chains per Au nanoparticle. The result is about 31 chains per Au NP.

$$N_{\text{graftes per Au NP}} = \frac{\left( \frac{W_{\text{peptide polymer in Au@P nanoparticles}}}{M_{\text{peptide polymer}}} \right) \times N_A}{\frac{W_{\text{rest weight of Au@P nanoparticles}}}{W_{\text{one Au nanoparticle}}}} \quad (\text{Equation S1})$$

(N represents chain number, W represents weight, M represents molecular weight and  $N_A$  represents Avogadro's number)

**Table S1** MIC and MBC values of Au@P NPs and free peptide polymers against Gram-positive bacteria.

| strains                     | Au@P NPs    |             | DLL <sub>90</sub> BLG <sub>10</sub> |             |
|-----------------------------|-------------|-------------|-------------------------------------|-------------|
|                             | MIC (µg/mL) | MBC (µg/mL) | MIC (µg/mL)                         | MBC (µg/mL) |
| <i>S. aureus</i> USA300 LAC | 6.25        | 12.5        | 6.25                                | 12.5        |
| <i>S. aureus</i> 2904       | 12.5        | 12.5        | 12.5                                | 12.5        |
| <i>S. aureus</i> 2902       | 12.5        | 12.5        | 6.25                                | 12.5        |
| <i>S. aureus</i> 2802       | 12.5        | 12.5        | 12.5                                | 12.5        |
| <i>S. aureus</i> 2202       | 12.5        | 12.5        | 12.5                                | 12.5        |
| <i>S. aureus</i> ATCC6538   | 12.5        | 25          | 12.5                                | 12.5        |
| <i>S. haemolyticus</i> 1303 | 3.13        | 3.13        | 3.13                                | 3.13        |
| <i>B. subtilis</i> BR151    | 3.13        | 3.13        | 3.13                                | 3.13        |

**Table S2** MIC and MBC values of Au@P NPs and free peptide polymers against Gram-negative bacteria.

| strains                  | Au@P NPs    |             | DLL <sub>90</sub> BLG <sub>10</sub> |             |
|--------------------------|-------------|-------------|-------------------------------------|-------------|
|                          | MIC (µg/mL) | MBC (µg/mL) | MIC (µg/mL)                         | MBC (µg/mL) |
| <i>E. coli</i> ATCC25922 | >200        | >200        | >200                                | >200        |
| <i>E. coli</i> 1608      | >200        | >200        | >200                                | >200        |
| <i>A. b.</i> BAA-747     | >200        | >200        | >200                                | >200        |
| <i>K. p.</i> ATCC700603  | >200        | >200        | >200                                | >200        |

## Reference

1. L. Pu, J. Xu, Y. Sun, Z. Fang, M. B. Chan-Park and H. Duan, *Biomater Sci*, 2016, **4**, 871-879.
